# Supplementary material
Source: Springer Nature journal article supplement (https://www.springermedizin.de/resource/supplementary/12943_2007_369_MOESM2_ESM.pdf/9554030)

*UMUC-3*

*T24*

*253J*

*WH1*

*TCC*

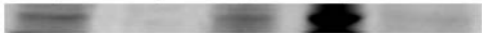

p-Stat3

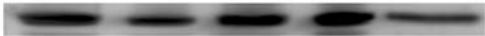

Stat3

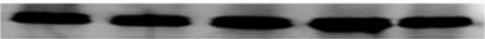

GAPDH

Supplement: MOESM2 [file 9554030]
